# Supplementary material for: 2-Methyl Nonyl Ketone From Houttuynia Cordata Thunb Alleviates LPS-Induced Inflammatory Response and Oxidative Stress in Bovine Mammary Epithelial Cells
Source: Front Chem. 2022 Jan 31;9:793475. doi: 10.3389/fchem.2021.793475 (PMC8842123; doi:10.3389/fchem.2021.793475)
Supplement: Supplementary file 4 [file Table1.XLSX]

## Sheet: cell viability
	LPS
	cell viability
	200	100	50	10	0
	0.558855	0.747192	0.946607	0.944145	1.01677
	0.562548	0.731189	0.903524	0.965072	1.05247
	0.584705	0.753347	0.867826	1.01185	0.839514
	0.595784	0.851823	0.949069	1.11279	1.06109
	0.620403	0.800123	0.925681	1.12263	1.01923
	0.624096	0.75704	0.910909	1.08324	1.03154
	0.670872	0.789044	0.908447	1.0537	0.977381
	0.679489	0.832128	0.910909	1.01308	1.002
	MNK
	cell viability
	0	0.1	1	10	15	20
	0.841168	0.898925	1.33275	1.19541	1.53297	1.34045
	1.16204	1.26857	1.22878	1.37253	1.41232	1.14921
	0.9631	1.08246	1.16461	1.49703	1.39949	0.870688
	0.968234	1.06064	1.13252	1.37253	1.08888	0.974651
	0.951548	0.999037	0.974651	1.23135	1.28269	0.898925
	0.947698	1.09402	1.1415	1.25702	1.15562	0.999037
	1.08118	1.16461	1.16717	1.45468	1.27242	1.13637
	1.08503	1.09145	1.27755	1.50858	1.33531	0.897642
	cell viability
	Control	LPS	MNK	LPS+MNK
	1.02299	0.753927	1.07079	0.790804
	1.02163	0.781243	1.0585	0.880947
	0.969725	0.726611	1.12133	0.793535
	0.958798	0.773048	1.1227	0.909629
	1.0066	0.753927	1.10221	0.87002
	1.02026	0.740269	1.02982	0.824949

## Sheet: ROS
	ROS
		64.81	% of Control
	Control	63.33	97.7164
		66.49	102.592
		64.62	99.7068
	LPS	79.45	122.589
		80.54	124.271
		75.1	115.877
	MNK	64.73	99.8766
		67.22	103.719
		64.58	99.6451
	LPS+MNK	71.53	110.369
		74.74	115.322
		70.21	108.332

## Sheet: qPCR
	Groups	GAPDH	IL-1β	△Ct	△△Ct	2-△△Ct	Relative Expression	Means
	C	17.82	29.11	11.29	-0.413333	1.33176	1.30012	1
		17.73	29.5	11.77	0.0666667	0.954842	0.932159
		18.22	30.27	12.05	0.346667	0.786399	0.767718
	L	18.33	29.34	11.01	-0.693333	1.61702	1.5786	1.51441
		17.75	28.61	10.86	-0.843333	1.79419	1.75157
		17.81	29.2	11.39	-0.313333	1.24258	1.21306
	M	17.67	29.1	11.43	-0.273333	1.2086	1.17989	1.05552
		17.67	29.28	11.61	-0.0933333	1.06683	1.04149
		18.06	29.81	11.75	0.0466667	0.968171	0.945172
	M+L	18.13	29.36	11.23	-0.473333	1.38831	1.35533	1.25984
		17.64	29.2	11.56	-0.143333	1.10445	1.07822
		18.01	29.25	11.24	-0.463333	1.37872	1.34597
	Groups	GAPDH	IL6	△Ct	△△Ct	2-△△Ct	Relative Expression	Means
	C	17.87	23.58	5.71	-0.0833333	1.05946	1.056	1
		18.13	23.84	5.71	-0.0833333	1.05946	1.056
		18.17	24.13	5.96	0.166667	0.890899	0.887991
	L	18.1	22.14	4.04	-1.75333	3.37137	3.36036	3.92684
		18.27	21.79	3.52	-2.27333	4.83439	4.81861
		17.94	21.88	3.94	-1.85333	3.61334	3.60155
	M	18.08	23.78	5.7	-0.0933333	1.06683	1.06335	0.974801
		17.47	23.45	5.98	0.186667	0.878633	0.875765
		17.82	23.63	5.81	0.0166667	0.988514	0.985287
	M+L	17.84	22.3	4.46	-1.33333	2.51984	2.51162	2.77063
		17.78	22.12	4.34	-1.45333	2.7384	2.72946
		18.23	22.4	4.17	-1.62333	3.08086	3.0708
	Groups	GAPDH	IL8	△Ct	△△Ct	2-△△Ct	Relative Expression	Means
	C	16.92	21.14	4.22	-0.0966667	1.0693	1.06551	1
		16.92	21.41	4.49	0.173333	0.886791	0.883649
		17.1	21.34	4.24	-0.0766667	1.05458	1.05084
	L	17.33	20.11	2.78	-1.53667	2.90123	2.89095	3.03646
		16.81	19.48	2.67	-1.64667	3.13109	3.12
		17.37	20.05	2.68	-1.63667	3.10947	3.09845
	M	16.45	20.97	4.52	0.203333	0.868541	0.865463	0.885807
		16.62	20.93	4.31	-0.00666667	1.00463	1.00107
		16.74	21.39	4.65	0.333333	0.793701	0.790888
	M+L	16.64	20.16	3.52	-0.796667	1.73708	1.73093	2.30345
		17.17	20.17	3	-1.31667	2.4909	2.48207
		17.15	20.03	2.88	-1.43667	2.70695	2.69735
	Groups	GAPDH	TNFα	△Ct	△△Ct	2-△△Ct	Relative Expression	Means
	C	17.32	27.83	10.51	-0.31	1.23971	1.22449	1
		17.58	28.5	10.92	0.1	0.933033	0.921581
		17.4	28.43	11.03	0.21	0.864537	0.853926
	L	17.22	27.16	9.94	-0.88	1.84038	1.81779	1.6998
		17.38	27.39	10.01	-0.81	1.75321	1.73169
		17.36	27.53	10.17	-0.65	1.56917	1.54991
	M	16.98	27.77	10.79	-0.03	1.02101	1.00848	0.932031
		16.74	27.84	11.1	0.28	0.823591	0.813483
		17.29	28.13	10.84	0.02	0.986233	0.974128
	M+L	17.29	27.56	10.27	-0.55	1.46409	1.44612	1.2773
		16.9	27.6	10.7	-0.12	1.08673	1.0734
		17.08	27.49	10.41	-0.41	1.32869	1.31238
	Groups	GAPDH	TGFβ1	△Ct	△△Ct	2-△△Ct	Relative Expression	Means
	C	15.81	21.95	6.14	-0.116667	1.08423	1.08223	1
		16.1	22.45	6.35	0.0933333	0.937354	0.935627
		16.4	22.68	6.28	0.0233333	0.983957	0.982144
	L	16.72	22.41	5.69	-0.566667	1.4811	1.47837	1.51488
		16.31	22.15	5.84	-0.416667	1.33484	1.33238
		16.57	22.03	5.46	-0.796667	1.73708	1.73388
	M	15.84	22.25	6.41	0.153333	0.899171	0.897514	1.00981
		16.38	22.75	6.37	0.113333	0.92445	0.922746
		15.96	21.94	5.98	-0.276667	1.21139	1.20916
	M+L	16.28	22.34	6.06	-0.196667	1.14605	1.14394	1.07591
		16.25	22.47	6.22	-0.0366667	1.02574	1.02385
		16.27	22.44	6.17	-0.0866667	1.06191	1.05996
	Groups	GAPDH	P65	△Ct	△△Ct	2-△△Ct	Relative Expression	Means
	C	16.49	28.01	11.52	0.296667	0.814131	0.800526	1
		16.36	27.63	11.27	0.0466667	0.968171	0.951991
		16.38	27.26	10.88	-0.343333	1.26868	1.24748
	L	17.13	27.35	10.22	-1.00333	2.00463	1.97113	1.85746
		15.89	26.67	10.78	-0.443333	1.35974	1.33702
		16.87	26.89	10.02	-1.20333	2.30271	2.26423
	M	16.4	27.91	11.51	0.286667	0.819794	0.806094	0.822428
		16.33	27.47	11.14	-0.0833333	1.05946	1.04176
		16.21	28.1	11.89	0.666667	0.629961	0.619433
	M+L	16.15	27.43	11.28	0.0566667	0.961483	0.945415	0.814389
		16.38	27.41	11.03	-0.193333	1.1434	1.12429
		15.81	28.43	12.62	1.39667	0.379806	0.373459
	Groups	GAPDH	P50	△Ct	△△Ct	2-△△Ct	Relative Expression	Means
	C	16.49	25.24	8.75	-0.31	1.23971	1.21463	1
		16.36	25.82	9.46	0.4	0.757858	0.742528
		16.38	25.35	8.97	-0.09	1.06437	1.04284
	L	17.13	23.6	6.47	-2.59	6.02099	5.8992	3.82164
		15.89	23.5	7.61	-1.45	2.73208	2.67682
		16.87	24.37	7.5	-1.56	2.94854	2.8889
	M	16.4	24.97	8.57	-0.49	1.40444	1.37604	1.39551
		16.33	24.9	8.57	-0.49	1.40444	1.37604
		16.21	24.72	8.51	-0.55	1.46409	1.43447
	M+L	16.15	25.16	9.01	-0.05	1.03526	1.01432	1.63973
		16.38	24.1	7.72	-1.34	2.53151	2.48031
		15.81	24.33	8.52	-0.54	1.45397	1.42456
	Groups	GAPDH	H0-1	△Ct	△△Ct	2-△△Ct	Relative Expression	Means
	C	18.1	23.24	5.14	-0.27	1.20581	1.19464	1
		17.99	23.49	5.5	0.09	0.939523	0.930825
		17.73	23.32	5.59	0.18	0.882703	0.874531
	L	17.99	24.59	6.6	1.19	0.438303	0.434245	0.721786
		17.98	23.34	5.36	-0.05	1.03526	1.02568
		18.06	23.96	5.9	0.49	0.712025	0.705433
	M	17.89	23.3	5.41	0	1	0.990742	1.29699
		18	22.98	4.98	-0.43	1.34723	1.33476
		18.56	23.31	4.75	-0.66	1.58008	1.56545
	M+L	18.39	23.43	5.04	-0.37	1.29235	1.28039	1.20627
		18.27	23.76	5.49	0.08	0.946058	0.937299
		18.33	23.24	4.91	-0.5	1.41421	1.40112

## Sheet: WB
	GAPDH was used as an internal reference for Western blotting analysis.
			All data are the ratio of the target protein to the GAPDH for grayscale analysis
	C	L	M	M+L
STAT3	0.349561	1.36515	0.634471	0.78613
	0.518937	0.880741	0.666595	0.450113
	0.473327	0.919362	0.579472	0.156093
	C	L	M	M+L
TNFR1	0.883396	1.03399	0.870217	0.812558
	1.1555	1.27429	0.940381	0.630025
	0.921587	1.10599	0.840412	0.798668
	C	L	M	M+L
TGFβ	0.979993	1.16914	0.795378	0.804596
	0.872656	1.16233	0.94125	0.955329
	1.08792	1.29434	0.756778	0.874346
	C	L	M	M+L
IL-6	0.712832	0.886002	0.631328	0.589412
	0.409688	1.00006	0.645149	0.584486
	0.831578	0.861632	0.801451	0.630109
	C	L	M	M+L
TNF-α	0.59385	1.05107	0.651531	0.752342
	0.47483	0.8852	0.520603	0.465548
	0.404793	0.704292	0.460755	0.516219
	C	L	M	M+L
TLR4	0.474275	0.913318	0.555621	0.54518
	0.591484	0.81003	0.669424	0.637139
	0.497116	0.659151	0.426778	0.345488
	C	L	M	M+L
p-p65/p65	0.938113	1.09745	0.768492	0.753863
	0.875349	0.988615	0.76136	0.674987
	0.656529	0.750135	0.696027	0.668829
	C	L	M	M+L
MYD88	0.461273	0.626969	0.37062	0.493188
	0.536382	0.669696	0.715955	0.558395
	0.544927	0.654935	0.413647	0.481113
	C	L	M	M+L
Nrf2	1.22426	0.747221	1.0565	0.827535
	1.45561	0.949012	1.44819	1.35922
	1.37961	1.00538	1.24314	1.22075
	C	L	M	M+L
p-AKT/AKT	1.10237	0.961229	1.1729	1.29399
	1.10573	0.650324	1.03864	1.03071
	0.885869	0.699333	0.861161	1.00805
	C	L	M	M+L
p-ERK/ERK	0.628774	0.750322	1.22788	1.10576
	0.807619	0.745813	1.25413	0.943142
	0.617407	1.00987	1.0808	1.06935
